# Supplementary material for: Vein Patterning by Tissue-Specific Auxin Transport
Source: bioRxiv or medRxiv preprint supplement (doi:10.1101/866632), 2019-12-06
Supplement: Supplementary file [file media-1.pdf]

**Table 1. Origin and Nature of Lines.**

| <b>Line</b>      | <b>Origin/Nature</b>                                                                                                                                                                                                                                                                                                                                                                       |
|------------------|--------------------------------------------------------------------------------------------------------------------------------------------------------------------------------------------------------------------------------------------------------------------------------------------------------------------------------------------------------------------------------------------|
| PIN1::gPIN1:YFP  | (Xu et al., 2006)                                                                                                                                                                                                                                                                                                                                                                          |
| PIN1::nYFP       | Transcriptional fusion of <i>PIN1</i> (AT1G73590; -4,171 to -1; primers: “PIN1 transc 4171 forw” and “PIN1 transc rev”) to HTA6:EYFP (Zhang et al., 2005)                                                                                                                                                                                                                                  |
| PIN1::gPIN1:CFP  | (Gordon et al., 2007)                                                                                                                                                                                                                                                                                                                                                                      |
| <i>pin1-051</i>  | NASC; GK-051A10-012139 (Kleinboelting et al., 2012); contains a T-DNA insertion after +2234 of <i>PIN1</i>                                                                                                                                                                                                                                                                                 |
| PIN1::gPIN1:GFP  | Xu et al. 2006                                                                                                                                                                                                                                                                                                                                                                             |
| ATML1::cPIN1:GFP | Transcriptional fusion of <i>ATML1</i> (AT4G21750; -5,016 to -1,597; primers “XhoI ATML1 p F” and “BamHI ATML1p R”) to translational fusion of <i>PIN1</i> cDNA (GenBank accession no. AY093960; ABRC clone no. U12338; primers “BamHI PIN1 cDNA F” and “KpnI PIN1 cDNA R”) to EGFP (Clontech; insertion after +651 of <i>PIN1</i> ; primers “XhoI GFP no ATG Fwd” and “XhoI GFP no* Rev”) |
| PIN1::cPIN1:GFP  | Transcriptional fusion of <i>PIN1</i> (-4,168 to -14; primers “XhoI full length PIN1p F” and “BamHI PIN1p rev”) to translational fusion of <i>PIN1</i> cDNA (GenBank accession no. AY093960; ABRC clone no. U12338; primers “BamHI PIN1 cDNA F” and “KpnI PIN1 cDNA R”) to EGFP (Clontech; insertion after +651 of <i>PIN1</i> ; primers “XhoI GFP no ATG Fwd” and “XhoI GFP no* Rev”)     |

|                          |                                                                                                                                                                                                                                                                                                                                                                                                      |
|--------------------------|------------------------------------------------------------------------------------------------------------------------------------------------------------------------------------------------------------------------------------------------------------------------------------------------------------------------------------------------------------------------------------------------------|
| SHR::cPIN1:GFP           | Transcriptional fusion of <i>SHR</i> (AT4G37650; -2505 to -16; primers “SHR prom SalI Forw2” and “SHR prom BamHI Rev”) to translational fusion of <i>PIN1</i> cDNA (GenBank accession no. AY093960; ABRC clone no. U12338; primers “BamHI PIN1 cDNA F” and “KpnI PIN1 cDNA R”) to EGFP (Clontech; insertion after +651 of <i>PIN1</i> ; primers “XhoI GFP no ATG Fwd” and “XhoI GFP no* Rev”)        |
| SCL32::cPIN1:GFP         | Transcriptional fusion of <i>SCL32</i> (AT3G49950; -2888 to -2; primers “SCL32 Translational FWD” and “SCL32 prom BamHI Rev”) to translational fusion of <i>PIN1</i> cDNA (GenBank accession no. AY093960; ABRC clone no. U12338; primers “BamHI PIN1 cDNA F” and “KpnI PIN1 cDNA R”) to EGFP (Clontech; insertion after +651 of <i>PIN1</i> ; primers “XhoI GFP no ATG Fwd” and “XhoI GFP no* Rev”) |
| PIN3::gPIN3:YFP          | ABRC; (Zhou et al., 2011)                                                                                                                                                                                                                                                                                                                                                                            |
| PIN4::gPIN4:YFP          | ABRC; (Zhou et al., 2011)                                                                                                                                                                                                                                                                                                                                                                            |
| PIN7::gPIN7:YFP          | ABRC; (Zhou et al., 2011)                                                                                                                                                                                                                                                                                                                                                                            |
| <i>pin1-1</i>            | ABRC; WT at the <i>TTG1</i> (AT5G24520) locus (Galweiler et al., 1998; Goto N, 1987; Sawchuk et al., 2013)                                                                                                                                                                                                                                                                                           |
| <i>pin3-3</i>            | (Friml et al., 2002b)                                                                                                                                                                                                                                                                                                                                                                                |
| <i>pin4-2</i>            | (Friml et al., 2002a)                                                                                                                                                                                                                                                                                                                                                                                |
| <i>pin7<sup>En</sup></i> | (Blilou et al., 2005)                                                                                                                                                                                                                                                                                                                                                                                |

---

Blilou, I., Xu, J., Wildwater, M., Willemsen, V., Paponov, I., Friml, J., Heidstra, R., Aida, M., Palme, K., Scheres, B., 2005. The PIN auxin efflux

- facilitator network controls growth and patterning in Arabidopsis roots. *Nature* 433, 39-44.
- Friml, J., Benkova, E., Blilou, I., Wisniewska, J., Hamann, T., Ljung, K., Woody, S., Sandberg, G., Scheres, B., Jurgens, G., Palme, K., 2002a. AtPIN4 mediates sink-driven auxin gradients and root patterning in Arabidopsis. *Cell* 108, 661-673.
- Friml, J., Wisniewska, J., Benkova, E., Mendgen, K., Palme, K., 2002b. Lateral relocation of auxin efflux regulator PIN3 mediates tropism in Arabidopsis. *Nature* 415, 806-809.
- Galweiler, L., Guan, C., Muller, A., Wisman, E., Mendgen, K., Yephremov, A., Palme, K., 1998. Regulation of polar auxin transport by AtPIN1 in Arabidopsis vascular tissue. *Science* 282, 2226-2230.
- Gordon, S.P., Heisler, M.G., Reddy, G.V., Ohno, C., Das, P., Meyerowitz, E.M., 2007. Pattern formation during de novo assembly of the Arabidopsis shoot meristem. *Development* 134, 3539-3548.
- Goto N, S.M., Kranz AR, 1987. Effect of gibberellins on flower development of the pin-formed mutant of Arabidopsis thaliana. *Arabidopsis Information Service* 23, 66-71.
- Kleinboelting, N., Huep, G., Kloetgen, A., Viehoever, P., Weisshaar, B., 2012. GABI-Kat SimpleSearch: new features of the Arabidopsis thaliana T-DNA mutant database. *Nucleic Acids Res* 40, D1211-5.
- Sawchuk, M.G., Edgar, A., Scarpella, E., 2013. Patterning of leaf vein networks by convergent auxin transport pathways. *PLoS Genet* 9, e1003294.
- Xu, J., Hofhuis, H., Heidstra, R., Sauer, M., Friml, J., Scheres, B., 2006. A molecular framework for plant regeneration. *Science* 311, 385-388.
- Zhang, C., Gong, F.C., Lambert, G.M., Galbraith, D.W., 2005. Cell type-specific characterization of nuclear DNA contents within complex tissues and organs. *Plant Methods* 1, 7.
- Zhou, R., Benavente, L.M., Stepanova, A.N., Alonso, J.M., 2011. A recombineering-based gene tagging system for Arabidopsis. *Plant J* 66, 712-723.
