# Supplementary material for: Vein Patterning by Tissue-Specific Auxin Transport
Source: bioRxiv or medRxiv preprint supplement (doi:10.1101/866632), 2019-12-06
Supplement: Supplementary file [file media-2.pdf]

**Table 2. Genotyping Strategies.**

| <b>Line</b>              | <b>Strategy</b>                                                                                               |
|--------------------------|---------------------------------------------------------------------------------------------------------------|
| <i>pin1-051</i>          | <i>PIN1</i> : “pin1 GK LP” and “pin1 GK RP”; <i>pin1</i> : “pin1 GK RP” and “o8409”                           |
| <i>pin1-1</i>            | “pin1-1 F” and “pin1-1 R”; <i>TatI</i>                                                                        |
| <i>pin3-3</i>            | “pin3-3 F” and “pin3-3 R”; <i>StyI</i>                                                                        |
| <i>pin4-2</i>            | <i>PIN4</i> : “PIN4 forw geno II” and “PIN4en rev Ikram”;<br><i>pin4</i> : “PIN4en rev Ikram” and “en primer” |
| <i>pin7<sup>En</sup></i> | <i>PIN7</i> : “PIN7en forw Ikram” and “PIN7en rev”; <i>pin7</i> :<br>“PIN7en rev Ikram II” and “en primer”    |
