# Supplementary material for: Vein Patterning by Tissue-Specific Auxin Transport
Source: bioRxiv or medRxiv preprint supplement (doi:10.1101/866632), 2019-12-06
Supplement: Supplementary file [file media-3.pdf]

**Table 3. Oligonucleotide Sequences.**

| <b>Name</b>              | <b>Sequence (5' to 3')</b>                           |
|--------------------------|------------------------------------------------------|
| PIN1 transc 4171 forw    | GGGGACAAGTTTGTACAAAAAAGCAGGCTATGATC<br>CGATTGGATTCCG |
| PIN1 transc rev          | GGGGACCACTTTGTACAAGAAAGCTGGGTCTTTTG<br>TTCGCCGAGAAG  |
| pin GK LP                | ACTCTTTGGCAAACACAAACG                                |
| pin1 GK RP               | CTCTCAGATGCAGGTCTAGGC                                |
| o8409                    | ATATTGACCATCATACTCATTGC                              |
| XhoI ATML1 p F           | GCCCTCGAGTTTACATTGATTCTGAACTG                        |
| BamHI ATML1p R           | GATGGATCCTAACCGGTGGATTCAGGGAG                        |
| BamHI PIN1 cDNA F new    | TTAGGATCCATGATTACGGCGGCGGACTTC                       |
| KpnI PIN1 cDNA R         | CTCGGTACCTCATAGACCCAAGAGAATGTAG                      |
| XhoI GFP no ATG Fwd      | TTACTCGAGAGTGAGCAAGGGCGAGGAGCTGTT                    |
| XhoI GFP no* Rev         | TATCTCGAGTACTTGTACAGCTCGTCCATGCCGAG                  |
| XhoI full length PIN1p F | TGTCTCGAGATCCGATTGGATTCCGGTCTG                       |
| BamHI PIN1p rev          | AAGGGATCCGAGAAGAGAGAGGGAAGAGAG                       |
| SHR prom SalI Forw2      | AAAGTCGACCGAAGAAAGGGACAAAGAAGC                       |
| SHR prom BamHI Rev       | TGGGGATCCTTAATGAATAAGAAAATGAATAGAAG<br>AAAGGG        |
| SCL32 Translational FWD  | AGAGTCGACATCTTAGTAGAAATAAGCGAAC                      |
| SCL32 prom BamHI Rev     | ACTGGATCCGAGTCTGGTTTTAGAGAGAAATG                     |
| pin1-1 F                 | ATGATTACGGCGGCGGACTTCTA                              |
| pin1-1 R                 | TTCCGACCACCACCAGAAGCC                                |
| pin3-3 F                 | GGAGCTCAAACGGGTCAACCCG                               |
| pin3-3 R                 | GCTGGATGAGCTACAGCTATATTC                             |
| PIN4 forw geno II        | GTCCGACTCCACGGCCTTC                                  |
| PIN4en rev Ikram         | ATCTTCTTCTTCACCTTCCACTCT                             |
| en primer                | GAGCGTCGGTCCCCACACTTCTATAC                           |
| PIN7en forw Ikram        | CCTAACGGTTTCCCACTCA                                  |
| PIN7en rev               | TAGCTCTTTAGGGTTTAGCTC                                |
| PIN7en rev Ikram II      | GGTTTAGCTCTGCTGTGGAGTT                               |
