# Supplementary material for: Vein Patterning by Tissue-Specific Auxin Transport
Source: bioRxiv or medRxiv preprint supplement (doi:10.1101/866632), 2019-12-06

PIN1::gPIN1:GFP

ATML1::cPIN1:GFP

*pin1*  
PIN1::cPIN1:GFP

SHR::cPIN1:GFP

SCL32::cPIN1:GFP

**A**

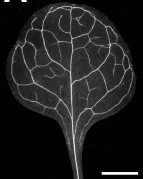

**B**

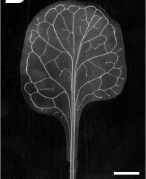

**C**

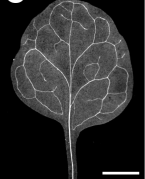

**D**

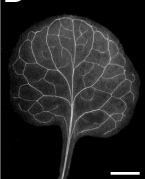

**E**

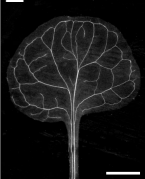

Supplement: Supplementary file [file media-4.pdf]
