# Supplementary material for: Vein Patterning by Tissue-Specific Auxin Transport
Source: bioRxiv or medRxiv preprint supplement (doi:10.1101/866632), 2019-12-06

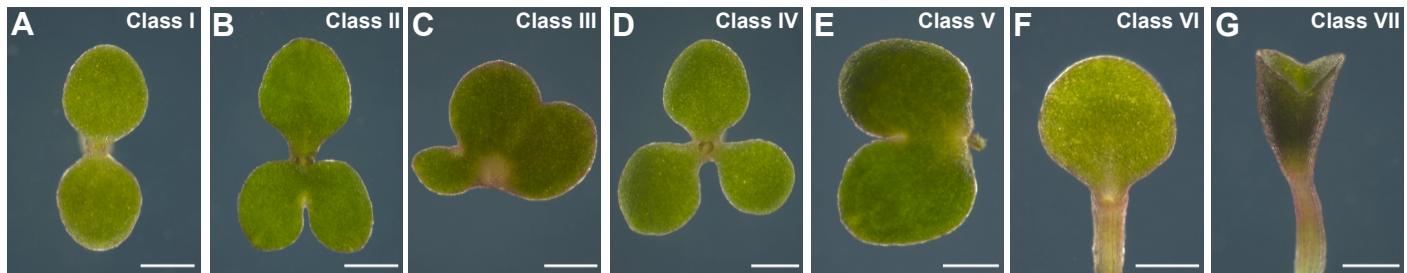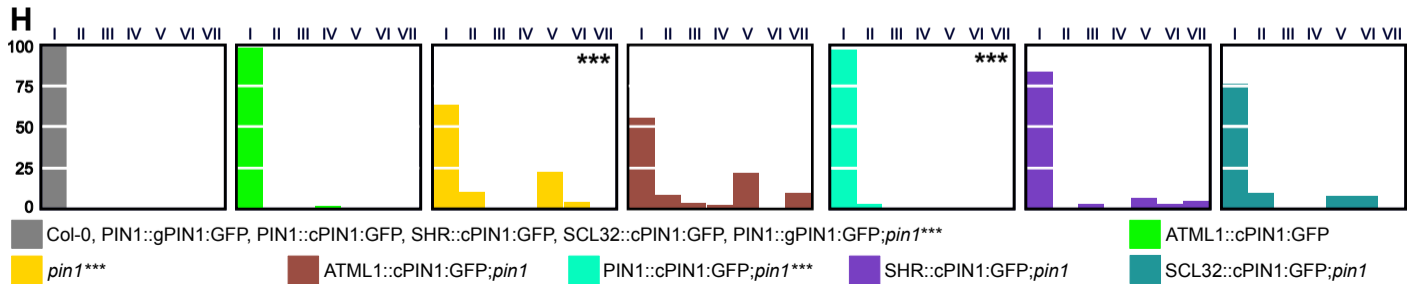

Supplement: Supplementary file [file media-5.pdf]
